# Supplementary material
Source: publisher figshare collection journal article supplement (https://plos.figshare.com/articles/dataset/_/5988817)
Supplement: Supplementary file [file 1]

S2 Table. Primers used for qPCR amplification.

|                                         |                           | Nomenclature<br>used in this work | Accession number<br>[JGI] / [NCBI]* | Primer sequences<br>[5' to 3' ; Forward / Reverse] | Annealing<br>[°C] |
|-----------------------------------------|---------------------------|-----------------------------------|-------------------------------------|----------------------------------------------------|-------------------|
| <i>Trichoderma<br/>harzianum</i>        | 18S rDNA                  | /                                 | 18SrDNA -KT897696.1 *               | GGTGGAGTGATTGTCTG / CTTACTAGGGATTCTCG              | 52                |
|                                         | Elongation factor 1-alpha | /                                 | 146236                              | CGCCATTGCTCGTGTGACATG / AATTCTCGCTCGCGGTGGTG       | 54                |
|                                         | Tubulin                   | /                                 | 134768                              | GTACTAAGTTGTTCTTTGCTGTTG / CTCTTGTACATACCAATTGCTC  | 60                |
|                                         | Aquaporin                 | Th99286                           | 99286                               | CGCCAGTATGTGTCAGGCG / GCGCCGGTGTAAAGAAGTCCC        | 56                |
|                                         |                           | Th98742                           | 98742                               | CCGCAGCAGTCACCGATGCC / CTGGTAGCCCGTGAAGTCGGTG      | 56                |
|                                         |                           | Th485859                          | 485859                              | GCCGCAGCGACCGTATCAGG / TATCCCTGAAGCTGCCCGTC        | 56                |
|                                         | Aquaglyceroporin          | Th90014                           | 90014                               | GTTCTGCATCTTCGCCCTGGC / CATATCCAATCATGAACGACACC    | 56                |
|                                         |                           | Th490850                          | 490850                              | CTCTATGCTCTGCTAGACGATGG / GACTTGGTGTCCATAACCAACTG  | 56                |
|                                         |                           | Th82211                           | 82211                               | CTGCTTTGTCAAGCCAGCGC / GAGGTCCAAATCGCGGCTCGG       | 56                |
|                                         |                           | Th92358                           | 92358                               | CACCATGAACATGGCTCGAGAC / CCTCACCAAGGCTCATCTCC      | 56                |
| <i>Fusarium<br/>solani<br/>(Necha2)</i> | X-Intrinsic Protein       | Th488926                          | 488926                              | GCGGGYTGVTGGTACGACC / TCATCTGCGCTCCAGCCTAGCC       | 60                |
|                                         | 18S rDNA                  | /                                 | 18SrDNA -jQ837837.1 *               | GTATTGCTTTGGCAGTACGCT / GGCCTTTCGGCCAAAGAACT       | 56                |
|                                         | Actin                     | /                                 | 63567                               | CGCCATTGCTCGTGTGACATG / AATTCTCGCTCGCGGTGGTG       | 56                |
|                                         | Tubulin                   | /                                 | 98894                               | GAGTACTAAGCGGTTTCGGATGC / GCATGCCGCTGCGCGCAAGGTTC  | 58                |
|                                         | Aquaporin                 | Necha2_90431                      | 90431                               | GTGGCTCGAATACCATACTGCC / GCGACGGGGCTCATCTGGC       | 56                |
|                                         |                           | Necha2_51592                      | 51592                               | CGGGTGGCTCTGCAAAACC / CCTCATGAGGACTGTCTTG          | 56                |
|                                         |                           | Necha2_93338                      | 93338                               | GGATCTCTCATCGCTGTGGCG / CGGATCGAAGGCGACTTGCCC      | 56                |
|                                         | Aquaglyceroporin          | Necha2_67872                      | 67872                               | GATCGGATACGGAAGTGAAG / CCAGGGCGCGGTATAGGTG         | 58                |
|                                         | X-Intrinsic Protein       | Necha2_72760                      | 72760                               | GATTACACGATATGGATATGCGG / GTTCTCCTTGGTCCAGGGTGG    | 60                |
