# Supplementary material
Source: publisher figshare collection journal article supplement (https://plos.figshare.com/articles/dataset/_/5988817)
Supplement: Supplementary file [file 1]

**S1 Table. Features of the non-redundant representative fungal MIP proteins from *Trichoderma* and *Fusarium* species used in the phylogenetic analysis.**

Reference species for MIP nomenclature: *Mycosphaerella fijiensis* (Mycfi) and *Laccaria bicolor* (Lacbi).

AQP, aquaporin; AQGP, aquaglyceroporin; XIP, X-intrinsic protein.

NCBI [http://www.ncbi.nlm.nih.gov/]; JGI [http://genome.jgi-psf.org/]

| Species                            | ID protein<br>[JGI]; [NCBI]* | Nomenclature<br>used in this work | MIP<br>sub-family | Phylogeny<br>group | TMH<br>number | AA<br>number | Molar<br>mass | Pi   |
|------------------------------------|------------------------------|-----------------------------------|-------------------|--------------------|---------------|--------------|---------------|------|
| <b><i>Trichoderma</i></b>          |                              |                                   |                   |                    |               |              |               |      |
| <i>Trichoderma asperellum</i>      | 64497                        | Triasperellum_64497               | XIP               | ◆                  | 6             | 301          | 32,22         | 8,19 |
|                                    | 60030                        | Triasperellum_60030               | Fps-like          | ●                  | 6             | 341          | 32,64         | 7,62 |
|                                    | 79784                        | Triasperellum_79784               | Fps-like          | ●                  | 6             | 581          | 64,26         | 5,86 |
|                                    | 150529                       | Triasperellum_150529              | "Other" AQGP      | ◆                  | 6             | 339          | 36,79         | 6,19 |
|                                    | 142240                       | Triasperellum_142240              | classicAQP        | ●                  | 6             | 311          | 32,63         | 7,92 |
|                                    | 170459                       | Triasperellum_170459              | classicAQP        | ■                  | 6             | 303          | 32,33         | 8,77 |
| <i>Trichoderma atroviride</i>      | 319992                       | Triatroviride_319992              | XIP               | ◆                  | 6             | 342          | 32,1          | 8,75 |
|                                    | 39327                        | Triatroviride_39327               | Fps-like          | ●                  | 6             | 299          | 32,65         | 7,6  |
|                                    | 283564                       | Triatroviride_283564              | Fps-like          | ●                  | 6             | 594          | 65,63         | 5,88 |
|                                    | 90169                        | Triatroviride_90169               | "Other" AQGP      | ◆                  | 6             | 344          | 37,57         | 6,75 |
|                                    | 6990                         | Triatroviride_31598               | classicAQP        | ●                  | 6             | 277          | 30,1          | 7,7  |
|                                    | 43816                        | Triatroviride_43816               | classicAQP        | ●                  | 6             | 313          | 32,73         | 7,8  |
| <i>Trichoderma citrinoviride</i>   | 31598                        | Triatroviride_6990                | classicAQP        | ■                  | 6             | 308          | 32,45         | 9,24 |
|                                    | 1108082                      | Tricitrinoviride_1108082          | XIP               | ◆                  | 6             | 294          | 31,44         | 8,34 |
|                                    | 1115377                      | Tricitrinoviride_1115377          | Fps-like          | ●                  | 6             | 315          | 34,27         | 6,2  |
|                                    | 161710                       | Tricitrinoviride_161710           | Fps-like          | ●                  | 6             | 294          | 29,62         | 7,63 |
|                                    | 1172378                      | Tricitrinoviride_1172378          | "Other" AQGP      | ◆                  | 6             | 336          | 36,35         | 6,04 |
|                                    | 61920                        | Tricitrinoviride_61920            | classicAQP        | ●                  | 6             | 284          | 30,78         | 6,03 |
| <i>Trichoderma gamsii</i>          | 1143547                      | Tricitrinoviride_1143547          | classicAQP        | ●                  | 6             | 304          | 31,49         | 7,58 |
|                                    | 1171100                      | Tricitrinoviride_1171100          | classicAQP        | ■                  | 6             | 302          | 32,26         | 8,52 |
|                                    | JPDN01000001.1*              | Trigamsii_JPDN01000001.1          | XIP               | ◆                  | 6             | 301          | 32,1          | 8,83 |
|                                    | ANCB02000213.1*              | Trigamsii_ANCB02000213.1          | Fps-like          | ●                  | 6             | 289          | 35,59         | 6,89 |
|                                    | JPDN01000042.1*              | Trigamsii_JPDN01000042.1          | Fps-like          | ●                  | 6             | 589          | 64,83         | 5,82 |
|                                    | JPDN01000071.1               | Trigamsii_JPDN01000071.1          | "Other" AQGP      | ◆                  | 6             | 344          | 37,61         | 6,55 |
| <i>Trichoderma guizhouense</i>     | JPDN01000006.1*              | Triga_JPDN01000006.1              | classicAQP        | ●                  | 6             | 288          | 31,2          | 7    |
|                                    | JPDN01000108.1*              | Trigamsii_JPDN01000108.1          | classicAQP        | ●                  | 6             | 312          | 32,73         | 7,81 |
|                                    | JPDN01000082.1*              | Trigamsii_JPDN01000082.1          | classicAQP        | ■                  | 6             | 303          | 32,55         | 9,05 |
|                                    | LVVK01000020.1*              | Triguizhouense_LVVK01000020.1     | XIP               | ◆                  | 6             | 327          | 34,8          | 8,67 |
|                                    | LVVK01000017.1*              | Triguizhouense_LVVK01000017.1     | Fps-like          | ●                  | 6             | 302          | 32,81         | 6,87 |
|                                    | LVVK01000019.1b*             | Triguizhouense_LVVK01000019.1b    | Fps-like          | ●                  | 6             | 274          | 29,47         | 7,57 |
| <i>Trichoderma hamatum</i>         | LVVK01000013.1*              | Triguizhouense_LVVK01000013.1     | Fps-like          | ●                  | 6             | 567          | 63,33         | 6,05 |
|                                    | LVVK01000015.1*              | Triguizhouense_LVVK01000015.1     | "Other" AQGP      | ◆                  | 6             | 346          | 37,63         | 6,5  |
|                                    | LVVK01000015.1*              | Triguizhouense_LVVK01000015.1     | classicAQP        | ●                  | 6             | 285          | 30,67         | 7,77 |
|                                    | LVVK01000018.1*              | Triguizhouense_LVVK01000018.1     | classicAQP        | ●                  | 6             | 311          | 32,86         | 7,77 |
|                                    | LVVK01000004.1               | Triguizhouense_LVVK01000004.1     | classicAQP        | ■                  | 6             | 302          | 32,41         | 6,51 |
|                                    | ANCB02000213.1*              | Trihamatum_ANCB02000213.1         | XIP               | ◆                  | 6             | 301          | 32,21         | 8,20 |
| <i>Trichoderma harzianum</i>       | 488926                       | Triharzianum_488926               | Fps-like          | ●                  | 6             | 343          | 32,94         | 6,88 |
|                                    | 90014                        | Triharzianum_90014                | Fps-like          | ●                  | 6             | 602          | 63,06         | 6    |
|                                    | 490850                       | Triharzianum_490850               | "Other" AQGP      | ◆                  | 6             | 332          | 35,75         | 6,18 |
|                                    | 82211                        | Triharzianum_82211                | classicAQP        | ●                  | 6             | 315          | 33,17         | 7,74 |
|                                    | 92358                        | Triharzianum_92358                | classicAQP        | ■                  | 6             | 314          | 33,7          | 8,68 |
|                                    | 99286                        | Triharzianum_99286                | XIP               | ◆                  | 6             | 294          | 31,55         | 8,75 |
| <i>Trichoderma koningii</i>        | 98742                        | Triharzianum_98742                | Fps-like          | ●                  | 6             | 303          | 32,81         | 6,87 |
|                                    | 485859                       | Triharzianum_485859               | Fps-like          | ●                  | 6             | 274          | 29,47         | 7,56 |
|                                    | BCGH01000003.1*              | Triharzianum_82211                | "Other" AQGP      | ◆                  | 6             | 567          | 63,25         | 6,09 |
|                                    | MDJU01000355.1*              | Triharzianum_92358                | classicAQP        | ●                  | 6             | 346          | 37,7          | 6,5  |
|                                    | BCGH01000004.1*              | Triharzianum_99286                | classicAQP        | ●                  | 6             | 284          | 30,67         | 7    |
|                                    | BCGH01000008.1*              | Triharzianum_98742                | classicAQP        | ■                  | 6             | 302          | 32,38         | 7,99 |
| <i>Trichoderma longibrachiatum</i> | 1343482                      | Triharzianum_485859               | classicAQP        | ■                  | 6             | 311          | 32,84         | 7,79 |
|                                    | 1339918                      | Trikoningii_BCGH01000003.1        | XIP               | ◆                  | 6             | 340          | 36,23         | 6,52 |
|                                    | 1439288                      | Trikoningii_MDJU01000355.1        | Fps-like          | ●                  | 6             | 302          | 32,79         | 6,87 |
|                                    | 1362869                      | Trikoningii_BCGH01000004.1        | Fps-like          | ●                  | 6             | 274          | 29,44         | 6,69 |
|                                    | 51184                        | Trikoningii_BCGH01000008.1        | "Other" AQGP      | ◆                  | 6             | 336          | 37,41         | 5,79 |
|                                    | 1340117                      | Trikoningii_BCGH01000002.1        | classicAQP        | ●                  | 6             | 285          | 30,67         | 7,77 |
| <i>Trichoderma pleuroti</i>        | 22769                        | Trikoningii_BCGH01000003.1        | classicAQP        | ●                  | 6             | 306          | 31,56         | 7,87 |
|                                    | MDJU01000245.1*              | Trikoningii_BCGH01000009.1        | classicAQP        | ■                  | 6             | partial      | -             | -    |
|                                    | MDJU01000355.1*              | Trilongibrachiatum_1343482        | XIP               | ◆                  | 6             | 294          | 31,46         | 7,64 |
|                                    | MDJU01000027.1*              | Trilongibrachiatum_1339918        | Fps-like          | ●                  | 6             | 315          | 34,01         | 6,51 |
|                                    | MDJU01000063.1*              | Trilongibrachiatum_1439288        | Fps-like          | ●                  | 6             | 275          | 29,44         | 7,49 |
|                                    | MDJU01000041.1*              | Trilongibrachiatum_1362869        | "Other" AQGP      | ◆                  | 6             | 336          | 36,29         | 5,79 |
| <i>Trichoderma reesei</i>          | MDJU01000029.1*              | Trilongibrachiatum_51184          | classicAQP        | ●                  | 6             | 285          | 30,68         | 7,77 |
|                                    | MDJU01000371.1*              | Trilongibrachiatum_1340117        | classicAQP        | ●                  | 6             | 306          | 31,56         | 7,87 |
|                                    | 128546                       | Trilongibrachiatum_22769          | classicAQP        | ■                  | 6             | 301          | 32,05         | 8,53 |
|                                    | 92240                        | Tripleuroti_MDJU01000245.1        | XIP               | ◆                  | 6             | 328          | 34,74         | 8,9  |
|                                    | 141480                       | Tripleuroti_MDJU01000355.1        | Fps-like          | ●                  | 6             | 302          | 32,87         | 6,87 |
|                                    | 102402                       | Tripleuroti_MDJU01000027.1        | Fps-like          | ●                  | 6             | 274          | 29,59         | 8,47 |
| <i>Trichoderma virens</i>          | 129514                       | Tripleuroti_MDJU01000063.1        | Fps-like          | ●                  | 6             | 567          | 63,09         | 6,26 |
|                                    | 67036                        | Tripleuroti_MDJU01000041.1        | "Other" AQGP      | ◆                  | 6             | 346          | 37,67         | 6,5  |
|                                    | 143256                       | Tripleuroti_MDJU01000029.1        | classicAQP        | ●                  | 6             | 304          | 32,46         | 6,51 |
|                                    | 8824                         | Tripleuroti_MDJU01000371.1        | classicAQP        | ■                  | 6             | 311          | 32,73         | 6,97 |
|                                    | 160074                       | Trireesei_128546                  | XIP               | ◆                  | 6             | 294          | 31,3          | 7,69 |
|                                    | 140684                       | Trireesei_92240                   | Fps-like          | ●                  | 6             | 314          | 34,19         | 6,7  |
| <i>Trichoderma virens</i>          | 87413                        | Trireesei_141480                  | Fps-like          | ●                  | 6             | 282          | 30,46         | 7,58 |
|                                    | 41159                        | Trireesei_102402                  | "Other" AQGP      | ◆                  | 6             | 336          | 36,31         | 6,11 |
|                                    | 66182                        | Trireesei_129514                  | classicAQP        | ●                  | 6             | 287          | 31,2          | 6,48 |
|                                    | 6760                         | Trireesei_67036                   | classicAQP        | ●                  | 6             | partial      | -             | -    |
|                                    | 228188                       | Trireesei_143256                  | classicAQP        | ■                  | 6             | 309          | 32,98         | 8    |
|                                    |                              | Trivirens_8824                    | XIP               | ◆                  | 6             | 294          | 31,37         | 8,2  |
| <i>Trichoderma virens</i>          |                              | Trivirens_160074                  | XIP               | ◆                  | 6             | 322          | 34,3          | 8    |
|                                    |                              | Trivirens_140684                  | Fps-like          | ●                  | 6             | 303          | 32,81         | 6,87 |
|                                    |                              | Trivirens_87413                   | Fps-like          | ●                  | 6             | 274          | 29,44         | 7,59 |
|                                    |                              | Trivirens_41159                   | Fps-like          | ●                  | 6             | 567          | 63,06         | 6    |
|                                    |                              | Trivirens_66182                   | "Other" AQGP      | ◆                  | 6             | 300          | 37,45         | 6,55 |
|                                    |                              | Trivirens_6760                    | classicAQP        | ●                  | 6             | partial      | -             | -    |
| <i>Trichoderma virens</i>          |                              | Trivirens_228188                  | classicAQP        | ■                  | 6             | 327          | 35,06         | 8,59 |

| Fusarium                              |                  |                                     |            |   |   |     |        |      |
|---------------------------------------|------------------|-------------------------------------|------------|---|---|-----|--------|------|
| <i>Fusarium solani</i>                | 72760            | Necha2_72760                        | XIP        | - | 6 | 343 | 36,23  | 7,61 |
| <i>Nectria haemotococca</i>           | 67872            | Necha2_67872                        | Fps-like   | - | 6 | 341 | 37,12  | 6,31 |
|                                       | 90431            | Necha2_90431                        | classicAQP | - | 6 | 289 | 32,06  | 6,58 |
|                                       | 51592            | Necha2_51592                        | classicAQP | - | 6 | 266 | 28,5   | 5,58 |
|                                       | 93338            | Necha2_93338                        | classicAQP | - | 7 | 532 | 58,95  | 8,32 |
| <i>Fusarium acuminatum</i>            | CBMG010003518.1* | Fusacuminatum_CBMG010003518.1       | XIP        | - | 6 | 327 | 35,38  | 7,62 |
|                                       | CBMG010003683.1* | Fusacuminatum_CBMG010003683.1       | Fps-like   | - | 6 | 341 | 37,05  | 6,43 |
|                                       | CBMG010002146.1* | Fusacuminatum_CBMG010002146.1       | Fps-like   | - | 6 | 555 | 61,38  | 9,1  |
|                                       | CBMG010000926.1* | Fusacuminatum_CBMG010000926.1       | classicAQP | - | 6 | 322 | 34,51  | 5,96 |
|                                       | CBMG010000883.1* | Fusacuminatum_CBMG010000883.1       | classicAQP | - | 6 | 296 | 32,03  | 8,83 |
|                                       | CBMG010000225.1* | Fusacuminatum_CBMG010000225.1       | classicAQP | - | 6 | 548 | 60,44  | 7,04 |
| <i>Fusarium avenaceum</i>             | JQGD01000013.1*  | Fusavenaceum_JQGD01000013.1         | XIP        | - | 6 | 327 | 35,25  | 7,6  |
|                                       | KIL87348.1*      | Fusavenaceum_KIL87348.1             | Fps-like   | - | 6 | 342 | 37,07  | 6,31 |
|                                       | JPYM01000003.1*  | Fusavenaceum_JPYM01000003.1         | Fps-like   | - | 6 | 554 | 61,13  | 9,01 |
|                                       | KIL88092.1*      | Fusavenaceum_KIL88092.1             | classicAQP | - | 6 | 322 | 34,67  | 5,67 |
|                                       | KIL87632.1*      | Fusavenaceum_KIL87632.1             | classicAQP | - | 6 | 291 | 31,54  | 8,83 |
|                                       | KIL89865.1*      | Fusavenaceum_KIL89865.1             | classicAQP | - | 6 | 548 | 60,4   | 7,74 |
| <i>Fusarium circinatum</i>            | AYJV01002164.1*  | Fuscircinata_AYJV01002164.1         | XIP        | - | 6 | 327 | 35,47  | 8,48 |
|                                       | AYJV01002992.1*  | Fuscircinata_AYJV01002992.1         | Fps-like   | - | 6 | 336 | 36,38  | 5,66 |
|                                       | JRVE01000048.1*  | Fuscircinata_JRVE01000048.1         | Fps-like   | - | 6 | 548 | 60,51  | 8,53 |
|                                       | AYJV01001480.1*  | Fuscircinata_AYJV01001480.1         | classicAQP | - | 6 | 320 | 34,27  | 5,78 |
|                                       | AYJV01003071.1*  | Fuscircinata_AYJV01003071.1         | classicAQP | - | 6 | 270 | 28,87  | 6,21 |
|                                       | AYJV01000611.1*  | Fuscircinata_AYJV01000611.1         | classicAQP | - | 6 | 539 | 59,61  | 7,16 |
| <i>Fusarium culmorum</i>              | CBMH010000861.1* | Fusculmorum_CBMH010000861.1         | XIP        | - | 6 | 330 | 35,69  | 7,04 |
|                                       | CBMH010000823.1* | Fusculmorum_CBMH010000823.1         | Fps-like   | - | 6 | 314 | 34,14  | 5,25 |
|                                       | CBMH010000770.1* | Fusculmorum_CBMH010000770.1         | Fps-like   | - | 6 | 548 | 60,53  | 8,68 |
|                                       | CBMH010000147.1* | Fusculmorum_CBMH010000147.1         | classicAQP | - | 6 | 316 | 34,04  | 6,58 |
|                                       | CBMH010000781.1* | Fusculmorum_CBMH010000781.1         | classicAQP | - | 6 | 286 | 30,76  | 8,78 |
|                                       | CBMH010001238.1* | Fusculmorum_CBMH010001238.1         | classicAQP | - | 6 | 546 | 59,976 | 7,73 |
| <i>Fusarium equiseti</i>              | CBMI010004636.1* | Fusequiseti_CBMI010004636.1         | XIP        | - | 6 | 327 | 35,42  | 7,65 |
|                                       | CBMI010002872.1* | Fusequiseti_CBMI010002872.1         | Fps-like   | - | 6 | 335 | 36,47  | 5,59 |
|                                       | CBMI010001576.1* | Fusequiseti_CBMI010001576.1         | Fps-like   | - | 6 | 546 | 60,27  | 8,96 |
|                                       | CBMI010000078.1* | Fusequiseti_CBMI010000078.1         | classicAQP | - | 6 | 319 | 34,11  | 6,02 |
|                                       | CBMI010004009.1* | Fusequiseti_CBMI010004009.1         | classicAQP | - | 6 | 266 | 28,2   | 5,92 |
|                                       | CBMI010004298.1* | Fusequiseti_CBMI010004298.1         | classicAQP | - | 6 | 544 | 59,73  | 7,85 |
| <i>Fusarium fujikuroi</i>             | ANFV01000069.1*  | Fusfujikuroi_ANFV01000069.1         | XIP        | - | 6 | 327 | 35,24  | 6,74 |
|                                       | ANFV01000060.1*  | Fusfujikuroi_ANFV01000060.1         | Fps-like   | - | 6 | 354 | 38,33  | 5,43 |
|                                       | JRVG01000144.1*  | Fusfujikuroi_JRVG01000144.1         | Fps-like   | - | 6 | 548 | 60,39  | 8,72 |
|                                       | CCT62977.1*      | Fusfujikuroi_CCT62977.1             | classicAQP | - | 6 | 320 | 34,3   | 5,78 |
|                                       | CCT74579.1*      | Fusfujikuroi_CCT74579.1             | classicAQP | - | 6 | 272 | 29,03  | 6,36 |
|                                       | CCT71530.1*      | Fusfujikuroi_CCT71530.1             | classicAQP | - | 6 | 549 | 59,47  | 7,74 |
| <i>Fusarium graminearum</i>           | 5133             | Fusgraminearum_5133                 | XIP        | - | 6 | 326 | 35,37  | 7,07 |
|                                       | 4917             | Fusgraminearum_4917                 | Fps-like   | - | 6 | 336 | 36,31  | 5,66 |
|                                       | 4321             | Fusgraminearum_4321                 | Fps-like   | - | 6 | 548 | 60,29  | 8,84 |
|                                       | 952              | Fusgraminearum_952                  | classicAQP | - | 6 | 318 | 34,4   | 6,44 |
|                                       | 4430             | Fusgraminearum_4430                 | classicAQP | - | 6 | 286 | 30,75  | 7,76 |
|                                       | 12878            | Fusgraminearum_12878                | classicAQP | - | 6 | 547 | 60,1   | 7,73 |
| <i>Fusarium pseudograminearum</i>     | EKJ77666*        | Fuspseudograminearum_EKJ77666       | XIP        | - | 6 | 330 | 35,69  | 6,65 |
|                                       | XP_009259022.1*  | Fuspseudograminearum_XP_009259022.1 | Fps-like   | - | 6 | 336 | 36,32  | 5,66 |
|                                       | JTGC01000315.1*  | Fuspseudograminearum_JTGC01000315.1 | Fps-like   | - | 6 | 548 | 60,32  | 8,67 |
|                                       | XP_009261345.1*  | Fuspseudograminearum_XP_009261345.1 | classicAQP | - | 6 | 318 | 34,16  | 6,15 |
|                                       | XP_009253247.1*  | Fuspseudograminearum_XP_009253247.1 | classicAQP | - | 6 | 286 | 30,73  | 8,44 |
|                                       | 009260256.1*     | Fuspseudograminearum_XP_009260256.1 | classicAQP | - | 6 | 547 | 60,12  | 7,73 |
| <i>Fusarium oxysporum</i>             | FOXG_5361        | Fusoxysporum_5361                   | XIP        | - | 6 | 327 | 35,37  | 7,11 |
|                                       | FOXG_3231        | Fusoxysporum_3231                   | Fps-like   | - | 6 | 331 | 35,84  | 5,66 |
|                                       | FOXG_19409       | Fusoxysporum_19409                  | Fps-like   | - | 6 | 548 | 60,27  | 8,7  |
|                                       | FOXG_1148        | Fusoxysporum_1148                   | classicAQP | - | 6 | 298 | 31,86  | 6,02 |
|                                       | FOXG_2910        | Fusoxysporum_2910                   | classicAQP | - | 6 | 273 | 29,13  | 6,34 |
|                                       | FOXG_5739        | Fusoxysporum_5739                   | classicAQP | - | 6 | 503 | 55,7   | 7,14 |
|                                       | FOXG_12344       | Fusoxysporum_12344                  | classicAQP | - | 5 | 499 | 54,8   | 8,61 |
| <i>Fusarium oxysporum lycopersici</i> | AAXH01000716*    | Fuslycopersici_AAXH01000716         | XIP        | - | 6 | 327 | 35,37  | 7,11 |
|                                       | EXL45426.1*      | Fuslycopersici_EXL45426.1           | Fps-like   | - | 6 | 388 | 41,95  | 5,84 |
|                                       | MALP01000202.1*  | Fuslycopersici_MALP01000202.1       | Fps-like   | - | 6 | 548 | 60,29  | 8,23 |
|                                       | AGBH01000103.1*  | Fuslycopersici_AGBH01000103.1       | classicAQP | - | 6 | 320 | 34,2   | 5,83 |
|                                       | EWZ86261.1*      | Fuslycopersici_EWZ86261.1           | classicAQP | - | 6 | 273 | 29,11  | 6,28 |
|                                       | AAXH01000387.1*  | Fuslycopersici_AAXH01000387.1       | classicAQP | - | 6 | 266 | 28,1   | 6,02 |
|                                       | AAXH01000729.1*  | Fuslycopersici_AAXH01000729.1       | classicAQP | - | 6 | 559 | 61,53  | 6,54 |
| <i>Fusarium oxysporum vasinfectum</i> | AGNC01000296.1*  | Fusvasinfectum_AGNC01000296.1       | XIP        | - | 6 | 327 | 35,4   | 7,11 |
|                                       | EXM16766.1*      | Fusvasinfectum_EXM16766.1           | Fps-like   | - | 6 | 370 | 39,98  | 6,1  |
|                                       | AGNC01000196.1*  | Fusvasinfectum_AGNC01000196.1       | Fps-like   | - | 6 | 548 | 60,28  | 8,7  |
|                                       | AGNC01000077.1*  | Fusvasinfectum_AGNC01000077.1       | classicAQP | - | 6 | 320 | 34,027 | 5,96 |
|                                       | AGNC01000348.1*  | >Fusvasinfectum_AGNC01000348.1      | classicAQP | - | 6 | 273 | 29,19  | 6,34 |
|                                       | EXM26604.1*      | Fusvasinfectum_EXM26604.1           | classicAQP | - | 6 | 559 | 61,53  | 6,54 |
| <i>Fusarium verticillioides</i>       | AAIM02000133.1*  | Fusverticillioides_AAIM02000133.1   | XIP        | - | 6 | 327 | 35,35  | 8,78 |
|                                       | EWG48857.1*      | Fusverticillioides_EWG48857.1       | Fps-like   | - | 6 | 331 | 35,82  | 5,66 |
|                                       | AAIM02000170.1*  | Fusverticillioides_AAIM02000170.1   | Fps-like   | - | 6 | 547 | 60,33  | 8,72 |
|                                       | EWG36264.1*      | Fusverticillioides_EWG36264.1       | classicAQP | - | 6 | 320 | 34,26  | 5,91 |
|                                       | EWG49201.1*      | Fusverticillioides_EWG49201.1       | classicAQP | - | 6 | 273 | 29,19  | 6,28 |
|                                       | EWG52904.1*      | Fusverticillioides_EWG52904.1       | classicAQP | - | 6 | 559 | 61,52  | 6,35 |
| <i>Fusarium virguliform</i>           | AEYB01001170.1*  | Fusvirguliforme_AEYB01001170.1      | XIP        | - | 6 | 320 | 34,7   | 7,66 |
|                                       | AEYB01000058.1*  | Fusvirguliforme_AEYB01000058.1      | Fps-like   | - | 6 | 325 | 35,04  | 6,29 |
|                                       | AEYB01001186.1*  | Fusvirguliforme_AEYB01001186.1      | classicAQP | - | 6 | 266 | 28,09  | 7,05 |
|                                       | AEYB01000674.1*  | Fusvirguliforme_AEYB01000674.1      | classicAQP | - | 6 | 265 | 28,13  | 5,91 |
|                                       | AEYB01000247.1*  | Fusvirguliforme_AEYB01000247.1      | classicAQP | - | 6 | 552 | 60,68  | 6,77 |

| Laccaria bicolor         |               |               |              |   |     |       |        |      |
|--------------------------|---------------|---------------|--------------|---|-----|-------|--------|------|
| Laccaria bicolor         | 317173        | Lacbi2_317173 | AQGP         | - | 6   | 332   | 35,82  | 9,13 |
|                          | 443240        | Lacbi2_443240 | AQGP         | - | 6   | 312   | 33,92  | 5,76 |
|                          | 576801        | Lacbi2_576801 | AQGP         | - | 6   | 263   | 28,36  | 8,55 |
|                          | 568479        | Lacbi2_568479 | AQGP         | - | 6   | 263   | 28,3   | 9,17 |
|                          | 671860        | Lacbi2_671860 | "Other" AQGP | - | 6   | 330   | 35,79  | 7,69 |
|                          | 482072        | Lacbi2_482072 | "Other" AQGP | - | 6   | 343   | 37,13  | 8,17 |
|                          | 456764        | Lacbi2_456764 | classicAQP   | - | 6   | 311   | 32,65  | 5,44 |
| Mycosphaerella fijiensis |               |               |              |   |     |       |        |      |
| Mycosphaerella fijiensis | 173306        | Mycfi2_173306 | XIP          | - | 6   | 394   | 42,25  | 8,43 |
|                          | 108013        | Mycfi2_108013 | AQGP         | - | 6   | 589   | 64,3   | 8,7  |
|                          | 33768         | Mycfi2_33768  | AQGP         | - | 6   | 309   | 3306   | 6,08 |
|                          | 133800        | Mycfi2_133800 | AQGP         | - | 6   | 311   | 34,621 | 8,14 |
|                          | 99980         | Mycfi2_99980  | AQGP         | - | 6   | 321   | 34,79  | 6,96 |
|                          | 165933        | Mycfi2_165933 | "Other" AQGP | - | 6   | 349   | 38,23  | 6,79 |
|                          | 99603         | Mycfi2_99603  | classicAQP   | - | 6   | 275   | 29,27  | 9,69 |
|                          | 134906        | Mycfi2_134906 | classicAQP   | - | 6   | 261   | 28,07  | 5,03 |
|                          | 120962        | Mycfi2_120962 | classicAQP   | - | 6   | 264   | 27,89  | 6,9  |
|                          | 76398         | Mycfi2_76398  | classicAQP   | - | 6   | 282   | 29,93  | 8,63 |
| 100823                   | Mycfi2_100823 | classicAQP    | -            | 6 | 271 | 29,42 | 8,57   |      |
