# Supplementary material
Source: publisher figshare collection journal article supplement (https://plos.figshare.com/articles/dataset/_/5988817)
Supplement: Supplementary file [file 1]

**S3 Table.** Detail of the TFBS nucleotide sites found on 1.5kb of each promoter of the four expressed MIP.

| XIP  |            |                   |               |        | AQP  |            |                   |              |        |
|------|------------|-------------------|---------------|--------|------|------------|-------------------|--------------|--------|
| Sens | Position   | Motif             | Bases         | Cutoff | Sens | Position   | Motif             | Bases        | Cutoff |
| +    | (5, 16)    | ROX1              | ACCATTGTCTTC  | 0.80   | +    | (3, 14)    | UASPHR            | ATTGCTACCTCG | 0.86   |
| +    | (13, 17)   | GCR1              | CTTCC         | 1.00   | -    | (53, 59)   | PHO2              | CTAAGTG      | 0.83   |
| +    | (15, 27)   | CSRE              | TCCAGATGACTGG | 0.81   | -    | (76, 87)   | UASPHR            | TGTTCTGCCTCG | 0.89   |
| +    | (21, 26)   | GCN4              | TGACTG        | 0.92   | -    | (77, 82)   | GCN4              | TGCCTC       | 0.80   |
| -    | (27, 32)   | GCN4              | TGGCTC        | 0.80   | +    | (90, 99)   | PHO4              | AGCACCTTGT   | 0.81   |
| -    | (44, 51)   | STE12             | ATGACACT      | 0.83   | -    | (96, 107)  | RAP1              | GCACCCTCACAA | 0.84   |
| -    | (45, 50)   | GCN4              | TGACAC        | 0.81   | +    | (113, 118) | GCN4              | TGAATC       | 0.86   |
| -    | (69, 80)   | SWI5              | ACAAGACGCTGG  | 0.82   | +    | (146, 150) | GCR1              | CATCC        | 0.93   |
| +    | (76, 87)   | SWI5              | CTTGTCTGCTGG  | 0.84   | +    | (150, 154) | GCR1              | CCTCC        | 0.86   |
| -    | (77, 85)   | repressor_of_CAR1 | AGCAGACAA     | 0.82   | +    | (164, 172) | repressor_of_CAR1 | AGCCGCTGC    | 0.92   |
| -    | (136, 140) | GCR1              | CCTCC         | 0.86   | +    | (175, 179) | ADR1              | TCTCC        | 0.89   |
| +    | (147, 158) | MIG1              | TCCCAGATTCTT  | 0.81   | +    | (199, 207) | repressor_of_CAR1 | AACCGGCGC    | 0.81   |
| -    | (187, 195) | repressor_of_CAR1 | AGCCACCCA     | 0.99   | +    | (207, 216) | LEU3              | CCGCATTCTGG  | 0.89   |
| -    | (215, 221) | SCB               | CCCGAAA       | 0.91   | -    | (213, 221) | repressor_of_CAR1 | AGAGGCCGA    | 0.81   |
| +    | (220, 225) | GCN4              | GGACTC        | 0.80   | +    | (232, 241) | PHO4              | TGCACCTGGT   | 0.81   |
| -    | (230, 241) | XBP1              | AGCTCGAGCCGA  | 0.85   | +    | (243, 252) | PHO4              | AGAACGTGGG   | 0.83   |
| -    | (238, 245) | STE12             | ATGAAGCT      | 0.83   | -    | (243, 252) | PHO4              | CCCACGTTCT   | 0.88   |
| -    | (245, 253) | repressor_of_CAR1 | CGGCGCCGA     | 0.82   | +    | (270, 275) | MCB               | ACGCGT       | 1.00   |
| -    | (264, 272) | repressor_of_CAR1 | AGCCACGAC     | 0.84   | -    | (270, 275) | MCB               | ACGCGT       | 1.00   |
| -    | (321, 326) | GCN4              | TGACTT        | 0.91   | +    | (305, 309) | GCR1              | CGTCC        | 0.86   |
| -    | (346, 355) | MCM1              | GCTGATTAGG    | 0.80   | -    | (310, 315) | GCN4              | TAATC        | 0.81   |
| -    | (348, 353) | GCN4              | TGATTA        | 0.80   | +    | (316, 324) | repressor_of_CAR1 | ATCCACCCA    | 0.86   |
| +    | (384, 388) | ADR1              | TCTCC         | 1.00   | -    | (330, 336) | PHO2              | CTAACTG      | 0.83   |
| +    | (390, 394) | GCR1              | CTTCC         | 1.00   | -    | (346, 354) | repressor_of_CAR1 | AGCTGACGA    | 0.82   |
| +    | (396, 404) | repressor_of_CAR1 | CGCCGCCCT     | 0.86   | -    | (412, 418) | PHO2              | CTAAAGG      | 0.80   |
| +    | (420, 425) | MCB               | ACGCAT        | 0.82   | +    | (445, 449) | GCR1              | CATCC        | 0.93   |
| -    | (420, 425) | MCB               | ATGCGT        | 0.82   | +    | (466, 472) | BAS2              | TAATAA       | 0.82   |

|   |            |                   |              |      |   |            |                   |              |      |
|---|------------|-------------------|--------------|------|---|------------|-------------------|--------------|------|
| + | (429, 433) | GCR1              | CTTCC        | 1.00 | - | (463, 468) | GCN4              | TTACTC       | 0.82 |
| + | (449, 455) | REB1              | TTACCCG      | 1.00 | + | (470, 476) | TBP               | TAAAAAA      | 0.84 |
| + | (451, 456) | MCB               | ACCCGT       | 0.82 | + | (479, 484) | ACE2              | GCTGGT       | 1.00 |
| - | (451, 456) | MCB               | ACGGGT       | 0.82 | - | (489, 496) | STE12             | ATCAAAC      | 0.83 |
| + | (461, 468) | PDR1/PDR3         | TCCCTGGA     | 0.82 | - | (497, 505) | repressor_of_CAR1 | ACCCGCCGG    | 0.92 |
| - | (529, 535) | PHO2              | TCAAATG      | 0.83 | - | (501, 507) | REB1              | ATACCCG      | 0.87 |
| - | (538, 543) | GCN4              | TGACGC       | 0.82 | - | (507, 512) | BAS2              | TAATAA       | 0.86 |
| + | (557, 563) | PHO2              | CTACATT      | 0.80 | - | (532, 540) | repressor_of_CAR1 | AGCCTCCAA    | 1.00 |
| - | (560, 566) | PHO2              | TTCAATG      | 0.83 | - | (534, 538) | GCR1              | CCTCC        | 0.86 |
| + | (565, 573) | repressor_of_CAR1 | AACTGCCCA    | 0.82 | - | (540, 546) | SCB               | CACCAAA      | 0.85 |
| + | (571, 582) | SWI5              | CCATCATGCTGG | 0.93 | - | (545, 552) | STE12             | ATGTAACA     | 0.83 |
| + | (584, 592) | MATalpha2         | CATGTATCT    | 0.83 | + | (547, 553) | PHO2              | TTACATT      | 0.83 |
| - | (598, 602) | GCR1              | CTTCC        | 1.00 | + | (559, 564) | GCN4              | TGACGC       | 0.82 |
| - | (622, 630) | repressor_of_CAR1 | AGACGCCGA    | 0.96 | + | (561, 566) | MCB               | ACGCAT       | 0.82 |
| - | (631, 635) | GCR1              | CGTCC        | 0.86 | - | (561, 566) | MCB               | ATGCGT       | 0.82 |
| + | (632, 638) | SCB               | GACGAAA      | 0.85 | + | (566, 572) | TBP               | TACAAAA      | 0.84 |
| + | (634, 640) | PHO2              | CGAAATG      | 0.80 | + | (576, 580) | GCR1              | CTTCC        | 1.00 |
| - | (643, 649) | SCB               | CACGAGA      | 0.85 | - | (597, 603) | PHO2              | CTACATT      | 0.80 |
| + | (651, 660) | PHO4              | CGGACGTGCA   | 0.81 | + | (610, 616) | SCB               | AACGAAA      | 0.85 |
| - | (651, 660) | PHO4              | TGCACGTCCG   | 0.83 | - | (618, 624) | REB1              | TAACCCG      | 0.90 |
| - | (652, 656) | GCR1              | CGTCC        | 0.86 | - | (623, 629) | TBP               | TATAATA      | 0.84 |
| - | (692, 696) | GCR1              | CATCC        | 0.93 | - | (622, 627) | BAS2              | TAATAA       | 0.85 |
| - | (721, 729) | repressor_of_CAR1 | AACCACCCA    | 0.88 | + | (626, 632) | TBP               | TATAGAA      | 0.89 |
| - | (755, 761) | RAP1              | ACACCCA      | 0.98 | + | (628, 634) | TBP               | TAGAAAA      | 0.84 |
| - | (759, 766) | STE12             | AAGAAACA     | 0.83 | + | (647, 658) | SWI5              | ATACACGGCTGG | 0.84 |
| - | (767, 773) | SCB               | AACGAAA      | 0.85 | - | (648, 656) | repressor_of_CAR1 | AGCCGTGTA    | 0.82 |
| + | (798, 803) | GCN4              | TGATTC       | 0.87 | + | (680, 686) | TBP               | TATAAGA      | 0.84 |
| + | (802, 809) | PDR1/PDR3         | TCCCTGGA     | 0.82 | + | (689, 694) | MCB               | ACGCAT       | 0.82 |
| - | (811, 819) | repressor_of_CAR1 | GGCTGCCAA    | 0.82 | - | (689, 694) | MCB               | ATGCGT       | 0.82 |
| + | (816, 824) | repressor_of_CAR1 | AGCCAGCAG    | 0.82 | + | (699, 705) | PHO2              | CTACATG      | 0.80 |
| - | (818, 829) | SWI5              | AAATCCTGCTGG | 0.91 | - | (736, 740) | GCR1              | CATCC        | 0.93 |
| - | (826, 832) | TBP               | TACAAAT      | 0.82 | - | (771, 777) | PHO2              | CTAAAAG      | 0.80 |
| + | (865, 871) | PHO2              | CTTAATG      | 0.80 | - | (772, 778) | TBP               | TCTAAAA      | 0.84 |
| - | (872, 883) | ROX1              | TCAAATGTTAC  | 0.80 | - | (792, 797) | BAS2              | TAATAA       | 0.86 |

|   |              |                   |                  |      |   |              |                   |              |      |
|---|--------------|-------------------|------------------|------|---|--------------|-------------------|--------------|------|
| - | (877, 883)   | PHO2              | TCAAATG          | 0.83 | + | (793, 799)   | TBP               | TATTAAG      | 0.86 |
| + | (881, 886)   | GCN4              | TGACAC           | 0.81 | + | (794, 801)   | STE12             | ATTAAACA     | 0.83 |
| - | (887, 893)   | PHO2              | GTAAGTT          | 0.80 | - | (802, 808)   | PHO2              | CTATATG      | 0.80 |
| + | (978, 986)   | repressor_of_CAR1 | AACAGCCAA        | 0.86 | + | (804, 810)   | TBP               | TATAGAA      | 0.89 |
| - | (988, 992)   | GCR1              | CTTCC            | 1.00 | + | (811, 817)   | PHO2              | CTGAATG      | 0.80 |
| - | (1018, 1025) | STE12             | ATGACACT         | 0.83 | - | (826, 831)   | GCN4              | TGAATC       | 0.86 |
| - | (1019, 1024) | GCN4              | TGACAC           | 0.81 | - | (873, 878)   | GCN4              | TAAGTC       | 0.81 |
| + | (1025, 1030) | GCN4              | TGATTA           | 0.80 | - | (876, 881)   | BAS2              | TAATAA       | 0.87 |
| - | (1047, 1053) | TBP               | TAAAAAT          | 0.82 | + | (895, 900)   | GCN4              | GGAGTC       | 0.80 |
| - | (1052, 1057) | GCN4              | TGATTA           | 0.80 | - | (896, 901)   | GCN4              | TGAGTC       | 0.87 |
| - | (1094, 1100) | PHO2              | TAACTT           | 0.86 | + | (908, 912)   | GCR1              | CTTCC        | 1.00 |
| + | (1097, 1103) | PHO2              | TAAATA           | 0.91 | + | (955, 966)   | SWI5              | AATTCTTGCTGG | 0.86 |
| - | (1097, 1103) | TBP               | TATTTAA          | 0.80 | + | (971, 979)   | MATalpha2         | CTTGTAAT     | 0.87 |
| + | (1103, 1111) | repressor_of_CAR1 | AGCCTACTA        | 0.82 | + | (973, 979)   | TBP               | TGTAAAT      | 0.82 |
| - | (1108, 1116) | MATalpha2         | CATGTTAGT        | 0.82 | + | (974, 980)   | PHO2              | GTAAATG      | 0.94 |
| + | (1117, 1125) | repressor_of_CAR1 | AGCCGGGCA        | 0.84 | + | (987, 993)   | PHO2              | CTATATG      | 0.80 |
| + | (1131, 1135) | ADR1              | TCTCC            | 0.82 | + | (992, 998)   | TBP               | TGTAAAA      | 0.84 |
| - | (1135, 1141) | PHO2              | CCAAATG          | 0.80 | + | (1029, 1035) | TBP               | GATAAAA      | 0.84 |
| - | (1150, 1159) | PHO4              | AGCATGTGGA       | 0.82 | - | (1030, 1041) | MIG1              | CGCCAGTTTTAT | 0.82 |
| + | (1150, 1161) | SWI5              | TCCACATGCTGG     | 0.82 | + | (1030, 1037) | STE12             | ATAAACT      | 0.83 |
| + | (1163, 1171) | repressor_of_CAR1 | AGCTGCTGA        | 0.83 | + | (1041, 1047) | PHO2              | GTAAATA      | 0.86 |
| + | (1175, 1184) | PHO4              | CCCACGTAGA       | 0.84 | + | (1046, 1052) | TBP               | TACAAAA      | 0.84 |
| - | (1189, 1195) | SCB               | CACGGAA          | 0.85 | + | (1055, 1059) | GCR1              | CCTCC        | 0.86 |
| + | (1255, 1274) | SMP1              | GCTGCTACTACTAGCC | 0.81 | + | (1060, 1064) | GCR1              | CCTCC        | 0.86 |
| - | (1274, 1279) | BAS2              | TAATAA           | 0.91 | - | (1060, 1071) | XBP1              | GGGTCGAGGAGG | 0.87 |
| + | (1303, 1308) | MCB               | ACGGGT           | 0.82 | - | (1104, 1112) | repressor_of_CAR1 | AGCAGTCAA    | 0.82 |
| - | (1303, 1308) | MCB               | ACCCGT           | 0.82 | + | (1105, 1110) | GCN4              | TGACTG       | 0.92 |
| - | (1304, 1310) | REB1              | ATACCCG          | 0.87 | + | (1111, 1115) | GCR1              | CTTCC        | 1.00 |

|   |              |                   |                 |      |   |              |                   |                |      |
|---|--------------|-------------------|-----------------|------|---|--------------|-------------------|----------------|------|
| - | (1335, 1339) | ADR1              | TCTCC           | 1.00 | + | (1121, 1129) | repressor_of_CAR1 | AGCAGCCGT      | 0.88 |
| - | (1343, 1348) | GCN4              | TGCCTC          | 0.80 | - | (1135, 1147) | CSRE              | TTCTCATGAATGG  | 0.81 |
| + | (1359, 1364) | GCN4              | TCACTC          | 0.81 | - | (1152, 1161) | MCM1              | CCACAAAAGG     | 0.81 |
| - | (1369, 1375) | PHO2              | TTAAACT         | 0.83 | - | (1154, 1160) | SCB               | CACAAAA        | 0.85 |
| - | (1381, 1387) | PHO2              | TTGAATG         | 0.83 | - | (1155, 1163) | repressor_of_CAR1 | AGCCACAAA      | 0.89 |
| - | (1396, 1401) | GCN4              | CRACTC          | 0.80 | + | (1170, 1179) | MCM1              | CTCAATCAGG     | 0.80 |
| - | (1407, 1411) | ADR1              | TCTCC           | 0.81 | + | (1209, 1214) | GCN4              | TGCCTC         | 0.80 |
| + | (1416, 1422) | RAP1              | GCACCCA         | 0.87 | - | (1252, 1263) | ROX1              | CACATTCTTCTC   | 0.82 |
| - | (1420, 1431) | SWI5              | GTCGCCGGCTGG    | 0.81 | + | (1292, 1297) | BAS2              | TAATAA         | 0.94 |
| + | (1422, 1430) | repressor_of_CAR1 | AGCCGGCGA       | 0.99 | - | (1330, 1336) | SCB               | AACGAAA        | 0.85 |
| + | (1424, 1433) | LEU3              | CCGGCGACGG      | 0.87 | + | (1352, 1357) | MCB               | ACCCGT         | 0.82 |
| + | (1430, 1435) | MCB               | ACGGGT          | 0.82 | - | (1352, 1357) | MCB               | ACGGGT         | 0.82 |
| - | (1430, 1435) | MCB               | ACCCGT          | 0.82 | - | (1372, 1389) | RLM1              | ATTCTATATACTGC | 0.80 |
| + | (1466, 1482) | GAL4              | GGACCAGAGACCTGC | 0.81 | - | (1376, 1382) | TBP               | TATATAC        | 0.86 |
| - | (1466, 1482) | GAL4              | GCAGGTCTCTGGTCC | 0.81 | + | (1377, 1383) | TBP               | TATATAT        | 0.93 |
|   |              |                   |                 |      | - | (1378, 1384) | TBP               | TATATAT        | 0.93 |
|   |              |                   |                 |      | + | (1379, 1385) | TBP               | TATATAG        | 0.87 |
|   |              |                   |                 |      | + | (1381, 1387) | TBP               | TATAGAA        | 0.89 |
|   |              |                   |                 |      | + | (1398, 1402) | ADR1              | TCTCC          | 0.87 |
|   |              |                   |                 |      | + | (1394, 1405) | UASPHR            | GTTCTCTCCTCG   | 0.80 |
|   |              |                   |                 |      | - | (1415, 1420) | BAS2              | TAATAA         | 0.86 |
|   |              |                   |                 |      | - | (1435, 1440) | GCN4              | TGAGTA         | 0.80 |
|   |              |                   |                 |      | + | (1448, 1452) | GCR1              | CATCC          | 0.93 |
|   |              |                   |                 |      | + | (1466, 1472) | TBP               | TATACAG        | 0.84 |
|   |              |                   |                 |      | + | (1489, 1497) | repressor_of_CAR1 | AACTGCCCA      | 0.82 |

| 92358 |            |                   |              |        |
|-------|------------|-------------------|--------------|--------|
| Sens  | Position   | Motif             | Bases        | Cutoff |
| +     | (15, 19)   | GCR1              | CTTCC        | 1.00   |
| +     | (23, 28)   | GCN4              | TGAGTC       | 0.87   |
| -     | (24, 29)   | GCN4              | TGACTC       | 1.00   |
| +     | (47, 52)   | GCN4              | TGCCTC       | 0.80   |
| +     | (47, 55)   | repressor_of_CAR1 | TGCCTCCAA    | 0.88   |
| +     | (49, 53)   | GCR1              | CCTCC        | 0.86   |
| +     | (58, 66)   | repressor_of_CAR1 | AACCACCCA    | 0.88   |
| -     | (74, 79)   | GCN4              | TGACTT       | 0.91   |
| +     | (77, 84)   | PDR1/PDR3         | TCAGCGGA     | 0.87   |
| -     | (77, 84)   | PDR1/PDR3         | TCCGCTGA     | 0.87   |
| +     | (95, 99)   | GCR1              | CGTCC        | 0.86   |
| -     | (98, 106)  | repressor_of_CAR1 | AGCCAACGG    | 0.81   |
| +     | (102, 107) | GCN4              | TGGCTC       | 0.80   |
| +     | (106, 117) | ABF1              | TCGCCAGAAACG | 0.82   |
| -     | (111, 122) | MIG1              | CCCCGCGTTTCT | 0.86   |
| +     | (115, 120) | MCB               | ACGCGG       | 0.87   |
| -     | (115, 120) | MCB               | CCGCGT       | 0.87   |
| +     | (128, 134) | PHO2              | CCAAATG      | 0.80   |
| -     | (136, 142) | PHO2              | CTAAACG      | 0.80   |
| +     | (155, 164) | PHO4              | AGCCCGTTGG   | 0.81   |
| +     | (163, 168) | GCN4              | GGACTC       | 0.80   |
| -     | (164, 169) | GCN4              | TGAGTC       | 0.87   |
| -     | (167, 174) | PDR1/PDR3         | TCCGTTGA     | 0.81   |
| -     | (173, 179) | PHO2              | TTAATTC      | 0.80   |
| -     | (174, 180) | PHO2              | TTTAATT      | 0.83   |
| +     | (175, 182) | STE12             | ATTAAACT     | 0.83   |
| +     | (176, 182) | PHO2              | TTAAACT      | 0.83   |

| 90014 |            |                   |                |        |
|-------|------------|-------------------|----------------|--------|
| Sens  | Position   | Motif             | Bases          | Cutoff |
| -     | (6, 14)    | repressor_of_CAR1 | GGCCTCCCA      | 0.83   |
| -     | (8, 12)    | GCR1              | CCTCC          | 0.86   |
| +     | (41, 50)   | PHO4              | CGCACTTGTG     | 0.84   |
| -     | (75, 84)   | MCM1              | CCCGATTAGA     | 0.84   |
| +     | (81, 96)   | PUT3              | GGGATATGCACGCC | 0.95   |
| +     | (100, 104) | GCR1              | CATCC          | 0.93   |
| -     | (123, 131) | repressor_of_CAR1 | AGCCGGCCCC     | 0.88   |
| -     | (128, 135) | STE12             | ATGAAGCC       | 0.86   |
| +     | (133, 141) | MATalpha2         | CATGTATGT      | 0.83   |
| +     | (167, 173) | PHO2              | CTTAATG        | 0.80   |
| +     | (181, 186) | SWI5              | TGCTGA         | 0.86   |
| -     | (193, 204) | ABF1              | TCACAAACAACA   | 0.82   |
| -     | (206, 213) | STE12             | ATGGAACC       | 0.86   |
| +     | (243, 251) | repressor_of_CAR1 | AGCCCCTCA      | 0.83   |
| +     | (272, 283) | UASPHR            | TTTCTTTCTTCG   | 0.83   |
| +     | (275, 286) | UASPHR            | CTTTCTTCGTCT   | 0.81   |
| +     | (288, 299) | UASPHR            | TTTTCTCCTTCT   | 0.81   |
| +     | (291, 295) | ADR1              | TCTCC          |        |
| +     | (297, 301) | ADR1              | TCTCC          |        |
| -     | (334, 340) | SCB               | CAAGAAA        | 0.85   |
| -     | (349, 357) | repressor_of_CAR1 | AGCAGCGCA      | 0.82   |
| +     | (360, 365) | GCN4              | TGTCTC         | 0.80   |
| +     | (364, 369) | GCN4              | TCACTC         | 0.81   |
| -     | (391, 397) | PHO2              | CAAAATT        | 0.80   |
| +     | (398, 402) | GCR1              | CATCC          | 0.93   |
| +     | (413, 422) | PHO4              | GGCGCGTGGA     | 0.82   |
| +     | (414, 419) | MCB               | GCGCGT         | 0.85   |

|   |            |                   |              |      |   |            |                   |              |      |
|---|------------|-------------------|--------------|------|---|------------|-------------------|--------------|------|
| - | (223, 234) | MIG1              | CCCCACACAAAC | 0.82 | - | (414, 419) | MCB               | ACGCGC       | 0.87 |
| + | (274, 278) | ADR1              | TCTCC        | 0.89 | - | (431, 436) | GCN4              | TGACTA       | 0.94 |
| + | (277, 288) | MIG1              | CCCCACACATCC | 0.82 | + | (463, 469) | SCB               | CACGAGA      | 0.85 |
| + | (284, 288) | GCR1              | CATCC        | 0.93 | - | (468, 473) | GCN4              | AGACTC       | 0.80 |
| + | (285, 293) | repressor_of_CAR1 | ATCCACCAT    | 0.81 | - | (518, 522) | GCR1              | CCTCC        | 0.86 |
| - | (304, 310) | REB1              | TTACCCC      | 0.87 | + | (528, 534) | TBP               | TATGAAA      | 0.85 |
| + | (307, 313) | PHO2              | GTAAATT      | 0.94 | + | (529, 536) | STE12             | ATGAAATG     | 0.83 |
| - | (313, 320) | PDR1/PDR3         | CCCGTGGA     | 0.81 | + | (530, 536) | PHO2              | TGAAATG      | 0.83 |
| - | (313, 322) | PHO4              | CGCCCGTGGA   | 0.84 | + | (543, 547) | GCR1              | CCTCC        | 0.86 |
| + | (340, 348) | repressor_of_CAR1 | TGCCGACAA    | 0.84 | + | (549, 553) | GCR1              | CTTCC        | 1.00 |
| + | (346, 352) | PHO2              | CAAAATT      | 0.80 | + | (554, 558) | GCR1              | CCTCC        | 0.86 |
| - | (361, 369) | repressor_of_CAR1 | AACAGCCCA    | 0.82 | + | (575, 579) | GCR1              | CATCC        | 0.93 |
| - | (387, 398) | MIG1              | CCCAACATTGTT | 0.81 | + | (584, 589) | GCN4              | TTACTC       | 0.82 |
| - | (391, 402) | RAP1              | CCACCCCAACAT | 0.84 | + | (584, 590) | REB1              | TTACTCG      | 0.85 |
| - | (396, 404) | repressor_of_CAR1 | AGCCACCCC    | 0.92 | + | (586, 591) | MCB               | ACTCGT       | 0.82 |
| - | (439, 445) | PHO2              | CTAAAAG      | 0.80 | - | (586, 591) | MCB               | ACGAGT       | 0.82 |
| + | (444, 452) | repressor_of_CAR1 | AGCCTCCTG    | 0.89 | + | (612, 618) | REB1              | TTGCCCG      | 0.85 |
| + | (446, 450) | GCR1              | CCTCC        | 0.86 | + | (624, 628) | GCR1              | CTTCC        | 1.00 |
| + | (453, 461) | MATalpha2         | CCTGTAAGT    | 0.82 | + | (628, 632) | GCR1              | CGTCC        | 0.86 |
| + | (479, 484) | GCN4              | TGACTT       | 0.91 | - | (633, 639) | TBP               | TAAAAAA      | 0.84 |
| + | (485, 490) | GCN4              | TGGCTC       | 0.80 | - | (691, 697) | PHO2              | CTCAATT      | 0.80 |
| + | (561, 572) | SWI5              | AGTTTCTGCTGG | 0.89 | - | (696, 702) | REB1              | TCACCCT      | 0.80 |
| - | (569, 575) | REB1              | TTACCAG      | 0.85 | - | (703, 712) | MCM1              | CCGAATCAGG   | 0.89 |
| - | (583, 587) | GCR1              | CTTCC        | 1.00 | + | (705, 710) | GCN4              | TGATTC       | 0.87 |
| - | (600, 604) | ADR1              | TCTCC        | 0.85 | + | (717, 725) | repressor_of_CAR1 | AGCCTCCGA    | 1.01 |
| - | (624, 628) | GCR1              | CGTCC        | 0.86 | + | (719, 723) | GCR1              | CCTCC        | 0.86 |
| + | (641, 646) | MCB               | ACGCAT       | 0.82 | + | (730, 735) | MCB               | GCGCGT       | 0.85 |
| - | (641, 646) | MCB               | ATGCGT       | 0.82 | - | (730, 735) | MCB               | ACGCGC       | 0.87 |
| - | (655, 660) | GCN4              | TGACTT       | 0.91 | + | (783, 794) | MIG1              | CCCCAGGTCGTT | 0.81 |
| + | (660, 666) | TBP               | AATAAAA      | 0.84 | - | (816, 823) | STE12             | ATGAAATC     | 0.90 |
| + | (678, 682) | GCR1              | CTTCC        | 1.00 | + | (824, 828) | GCR1              | CTTCC        | 1.00 |
| - | (694, 701) | PDR1/PDR3         | TACGTGGA     | 0.81 | + | (831, 837) | REB1              | TCACCCG      | 0.92 |
| + | (696, 702) | SCB               | CACGTAA      | 0.85 | + | (833, 838) | MCB               | ACCCGT       | 0.82 |
| + | (700, 705) | BAS2              | TAATGA       | 0.84 | - | (833, 838) | MCB               | ACGGGT       | 0.82 |

|   |              |                   |               |      |   |              |                   |              |      |
|---|--------------|-------------------|---------------|------|---|--------------|-------------------|--------------|------|
| - | (705, 711)   | PHO2              | TCAAATT       | 0.83 | + | (836, 840)   | GCR1              | CGTCC        | 0.86 |
| - | (707, 713)   | TBP               | TATCAAA       | 0.85 | - | (879, 884)   | GCN4              | TAACTC       | 0.81 |
| - | (721, 730)   | PHO4              | GGCAAGTGTT    | 0.82 | + | (902, 907)   | GCN4              | TGATTC       | 0.87 |
| + | (739, 747)   | repressor_of_CAR1 | AGCCACCAG     | 0.95 | - | (902, 909)   | STE12             | ATGAATCA     | 0.83 |
| - | (763, 769)   | REB1              | TTGCCCG       | 0.85 | - | (903, 908)   | GCN4              | TGAATC       | 0.86 |
| - | (770, 779)   | MCM1              | CCCCATTAGT    | 0.83 | + | (909, 915)   | REB1              | TTTCCCG      | 0.85 |
| - | (776, 784)   | repressor_of_CAR1 | AGCGGCCCC     | 0.86 | + | (946, 950)   | GCR1              | CATCC        | 0.93 |
| - | (804, 808)   | GCR1              | CCTCC         | 0.86 | + | (949, 960)   | MIG1              | CCCCGTATTTGA | 0.83 |
| + | (840, 851)   | UASPHR            | TCTTAGTCCTCG  | 0.80 | - | (963, 969)   | REB1              | TTCCCG       | 0.85 |
| + | (851, 862)   | XBP1              | GTCTCGCAGCGG  | 0.83 | - | (966, 970)   | GCR1              | CTTCC        | 1.00 |
| + | (875, 880)   | GCN4              | TGACTT        | 0.91 | + | (969, 978)   | PHO4              | AGAACGTGTT   | 0.82 |
| + | (880, 885)   | GCN4              | TGCCTC        | 0.80 | - | (969, 978)   | PHO4              | AACACGTTCT   | 0.86 |
| + | (938, 945)   | STE12             | ATGCAACC      | 0.86 | + | (972, 977)   | MCB               | ACGTGT       | 0.82 |
| + | (944, 956)   | CSRE              | CCCGGAGAGATGG | 0.81 | - | (972, 977)   | MCB               | ACACGT       | 0.82 |
| - | (947, 951)   | ADR1              | TCTCC         | 0.91 | + | (1047, 1051) | GCR1              | CGTCC        | 0.86 |
| + | (958, 964)   | PHO2              | CTGAATT       | 0.80 | - | (1075, 1083) | repressor_of_CAR1 | AGCCGAAGA    | 0.84 |
| - | (988, 992)   | GCR1              | CCTCC         | 0.86 | - | (1099, 1107) | repressor_of_CAR1 | AGACGCAAA    | 0.83 |
| - | (996, 1000)  | GCR1              | CCTCC         | 0.86 | + | (1119, 1125) | REB1              | TTACCCG      | 1.00 |
| + | (998, 1006)  | repressor_of_CAR1 | AGGGGCCAA     | 0.81 | - | (1134, 1142) | repressor_of_CAR1 | AGCAGCAGA    | 0.83 |
| - | (1022, 1028) | REB1              | TTACCCC       | 0.87 | + | (1145, 1149) | GCR1              | CATCC        | 0.93 |
| + | (1063, 1071) | repressor_of_CAR1 | AGTCGCCTC     | 0.84 | - | (1150, 1155) | SWI5              | GGCTGG       | 0.83 |
| + | (1066, 1074) | repressor_of_CAR1 | CGCCTCCAA     | 0.87 | - | (1154, 1165) | SWI5              | AATTGAGGCTGG | 0.82 |
| + | (1068, 1072) | GCR1              | CCTCC         | 0.86 | + | (1159, 1165) | PHO2              | CTCAATT      | 0.80 |
| - | (1075, 1083) | repressor_of_CAR1 | GGCCGCCCA     | 0.94 | + | (1160, 1171) | ROX1              | TCAATTGTTATA | 0.84 |
| - | (1096, 1103) | STE12             | ATGAAACG      | 0.93 | - | (1165, 1171) | TBP               | TATAACA      | 0.84 |
| - | (1098, 1104) | SCB               | CATGAAA       | 0.85 | - | (1177, 1183) | REB1              | TTACCCA      | 0.87 |
| + | (1114, 1122) | repressor_of_CAR1 | AGCCACCTG     | 0.90 | + | (1189, 1200) | XBP1              | CCCACGAGGAGA | 0.80 |
| - | (1133, 1137) | ADR1              | TCTCC         | 0.86 | - | (1196, 1200) | ADR1              | TCTCC        | 0.82 |

|   |              |                   |              |      |   |              |                   |              |      |
|---|--------------|-------------------|--------------|------|---|--------------|-------------------|--------------|------|
| + | (1182, 1190) | repressor_of_CAR1 | TGCCACCAA    | 0.89 | - | (1217, 1224) | STE12             | AGGAAACC     | 0.86 |
| - | (1195, 1200) | GCN4              | TGAATC       | 0.86 | + | (1225, 1233) | repressor_of_CAR1 | AACCGCGGG    | 0.83 |
| + | (1196, 1207) | SWI5              | ATTCAAAGCTGG | 0.81 | - | (1230, 1236) | REB1              | TCACCCG      | 0.92 |
| - | (1198, 1209) | MIG1              | CCCCAGCTTTGA | 0.84 | + | (1258, 1266) | repressor_of_CAR1 | AGCCTGCAA    | 0.88 |
| - | (1207, 1215) | repressor_of_CAR1 | AGACGCCCC    | 0.86 | + | (1286, 1292) | TBP               | TAAAAAA      | 0.84 |
| - | (1214, 1225) | MIG1              | CCCCAGAAATAG | 0.83 | + | (1294, 1300) | TBP               | TATAATT      | 0.82 |
| - | (1224, 1228) | GCR1              | CCTCC        | 0.86 | + | (1295, 1301) | PHO2              | ATAATTT      | 0.80 |
| + | (1267, 1275) | repressor_of_CAR1 | AGCTTCCGA    | 0.86 | - | (1297, 1303) | PHO2              | TCAAATT      | 0.83 |
| + | (1269, 1273) | GCR1              | CTTCC        | 1.00 | + | (1309, 1313) | GCR1              | CCTCC        | 0.86 |
| - | (1321, 1325) | GCR1              | CATCC        | 0.93 | + | (1317, 1321) | GCR1              | CCTCC        | 0.86 |
| + | (1323, 1328) | MCB               | ATGCGT       | 0.82 | + | (1327, 1334) | STE12             | TTGAAACA     | 0.83 |
| - | (1323, 1328) | MCB               | ACGCAT       | 0.82 | + | (1338, 1349) | MIG1              | CCCCAATTCTTT | 0.83 |
| + | (1333, 1338) | GCN4              | TGACTA       | 0.94 | + | (1365, 1376) | RAP1              | ACACACATACAT | 0.88 |
| - | (1357, 1368) | SWI5              | GTTTCATGCAGG | 0.81 | + | (1386, 1394) | repressor_of_CAR1 | AGCATCCCA    | 0.82 |
| + | (1361, 1367) | SCB               | CATGAAA      | 0.85 | + | (1388, 1392) | GCR1              | CATCC        | 0.93 |
| + | (1362, 1369) | STE12             | ATGAAACT     | 0.97 | + | (1408, 1415) | STE12             | AAGAAACA     | 0.83 |
| - | (1368, 1374) | TBP               | TATATAG      | 0.87 | + | (1417, 1423) | PHO2              | CTGAATT      | 0.80 |
| + | (1369, 1375) | TBP               | TATATAG      | 0.87 | + | (1423, 1427) | ADR1              | TCTCC        | 0.86 |
| - | (1374, 1381) | STE12             | ATGAGACT     | 0.83 | + | (1436, 1444) | repressor_of_CAR1 | AGCCGCTCC    | 0.88 |
| + | (1381, 1386) | GCN4              | TGCCTC       | 0.80 | + | (1442, 1453) | UASPHR            | TCCTCTTCTCT  | 0.82 |
| + | (1386, 1390) | GCR1              | CTTCC        | 1.00 | + | (1446, 1450) | GCR1              | CTTCC        | 1.00 |
| - | (1405, 1411) | SCB               | CAAGAAA      | 0.85 | - | (1477, 1482) | SWI5              | GGCTGG       | 0.83 |
| + | (1412, 1423) | UASPHR            | TCTTCTTCCTCC | 0.90 | - | (1478, 1489) | XBP1              | TCGTCGAGGCTG | 0.80 |
| + | (1416, 1420) | GCR1              | CTTCC        | 1.00 | + | (1479, 1487) | repressor_of_CAR1 | AGCCTCGAC    | 0.83 |
| + | (1419, 1423) | GCR1              | CCTCC        | 0.86 | + | (1480, 1491) | XBP1              | GCCTCGACGATG | 0.87 |
| - | (1423, 1429) | PHO2              | TTGAATG      | 0.83 |   |              |                   |              |      |
| + | (1428, 1436) | repressor_of_CAR1 | AAGCGCCTA    | 0.81 |   |              |                   |              |      |
| - | (1433, 1442) | MCM1              | GCCAATTAGG   | 0.88 |   |              |                   |              |      |
| + | (1434, 1440) | PHO2              | CTAATTG      | 0.86 |   |              |                   |              |      |
| - | (1444, 1450) | TBP               | TATCAAA      | 0.85 |   |              |                   |              |      |
| + | (1449, 1455) | TBP               | TATACAC      | 0.82 |   |              |                   |              |      |
| + | (1463, 1470) | STE12             | GTGAAACA     | 0.83 |   |              |                   |              |      |
| - | (1473, 1479) | PHO2              | GTAACCT      | 0.80 |   |              |                   |              |      |
| - | (1488, 1493) | GCN4              | TGACTT       | 0.91 |   |              |                   |              |      |
