# Supplementary material
Source: publisher figshare collection journal article supplement (https://plos.figshare.com/articles/dataset/_/5988817)
Supplement: Supplementary file [file 1]

## S2 Fig

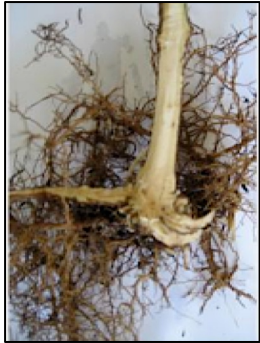

Water  
control

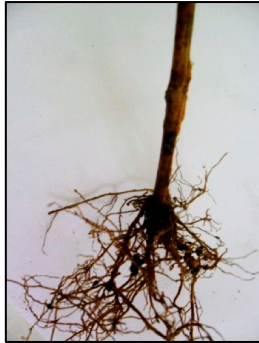

*F. Solani*  
*Fso14*

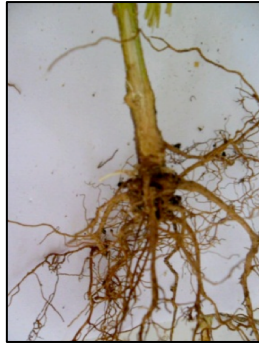

*T. Harzianum*  
*Ths97*

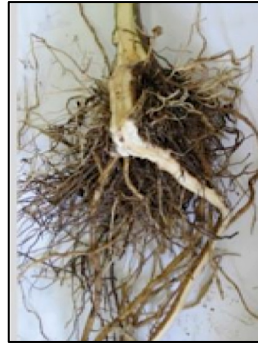

Preventive  
*Ths97 / Fso14*

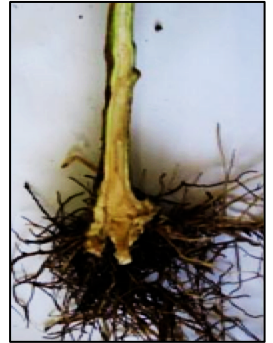

Curative  
*Fso14 / Ths97*
